# Supplementary material
Source: MDPI journal article supplement (https://www.mdpi.com/1424-8247/14/7/601)

# Synthesis report

1/9

SW: Version 1.1 | October 2018

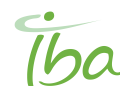

Document id: S2005270363

Batch Nr: PE2I-200527-2

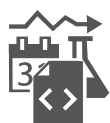

Start at 5/27/2020 9:20:44 AM  
End at 5/27/2020 9:41:17 AM  
Duration: 0:20:32

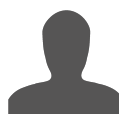

User: User Default (Supervisor)  
Level: Supervisor

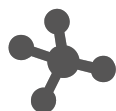

[18F]Fluorine  
FE-PE2I  
Status: Synthesis completed

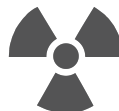

Start activity:  
End activity:  
Estimated yield: % n.d.c.

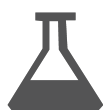

Recipe: PE2I riget (v2)  
Script: PE2I-riget (v6)

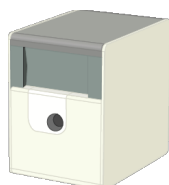

Synthera+  
IBA SN: SM182802  
Site Id: Synthera+ #1  
HW: 1246398

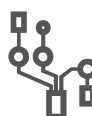

IFP: 2-2560-1021062547364  
Status: Single use IFP found  
Consumable:  
NA

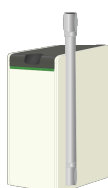

Synthera+ HPLC  
IBA SN: HP183703  
Site Id: HPLC #1  
HW: 1250402

Comments:

Name: Author

Name: Manager

Name: Quality

Date:

Date:

Date:

Comment:

Comment:

Comment:

# Synthesis report

2/9

SW: Version 1.1 | October 2018

Document id: S2005270363

Batch Nr: PE2I-200527-2

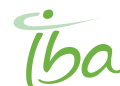

# Synthesis report

3/9

SW: Version 1.1 | October 2018

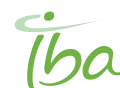

Document id: S2005270363

Batch Nr: PE2I-200527-2

## Synthera+ (SM182802) - Details

### Synthera+ (SM182802) - Synthesis evolution

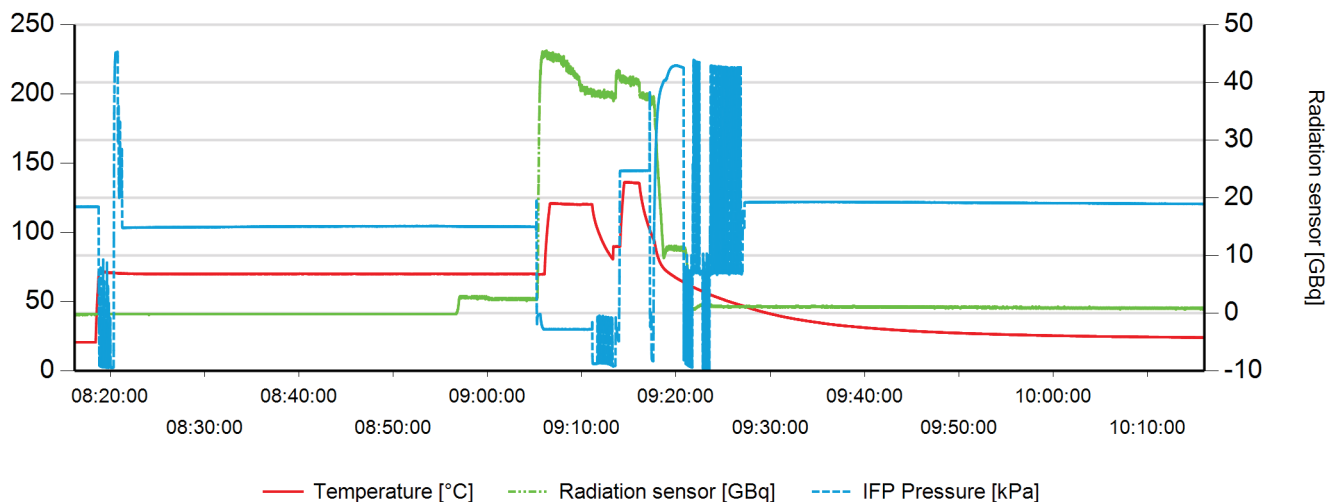

|            |                                  |  |  |
|------------|----------------------------------|--|--|
| 9:27:27 AM | Final sequence status: Completed |  |  |
| 8:16:13 AM | Command: Load                    |  |  |
| 8:17:51 AM | Command: Start                   |  |  |

#### Sequence evolution

|            |                               |                                   |  |
|------------|-------------------------------|-----------------------------------|--|
| 8:18:04 AM | Initialization                | Completed                         |  |
| 8:18:26 AM | Valve rotation test           | Completed                         |  |
| 8:18:44 AM | Temperature test and pre-heat | Completed                         |  |
| 8:18:43 AM | Action: Signal report         | Temperature value: 63,59 °C       |  |
| 8:20:01 AM | Purging of the IFP            | Completed                         |  |
| 8:20:20 AM | Vacuum test                   | Completed                         |  |
| 8:20:07 AM | Action: Signal report         | IFP Pressure value: 2,21 kPa      |  |
| 8:20:19 AM | Action: Signal report         | IFP Pressure value: 2,43 kPa      |  |
| 8:20:44 AM | Pressure test                 | Completed                         |  |
| 8:20:31 AM | Action: Signal report         | IFP Pressure value: 226,03 kPa    |  |
| 8:20:44 AM | Action: Signal report         | IFP Pressure value: 229,32 kPa    |  |
| 8:39:39 AM | Test tube 1 - 2 - 3 - 4       | Completed                         |  |
| 9:00:02 AM | WAITING FOR ACTIVITY          | Completed                         |  |
| 9:00:01 AM | Action: Resume (WD;USR;;)     |                                   |  |
| 9:05:07 AM | Trapping Fluorine-18          | Completed                         |  |
| 9:06:03 AM | Elution Fluorine-18           | Completed                         |  |
| 9:06:02 AM | Action: Signal report         | Radiation sensor value: 44,88 GBq |  |
| 9:13:34 AM | Drying Fluorine-18            | Completed                         |  |
| 9:11:21 AM | Action: Signal report         | IFP Pressure value: 5,13 kPa      |  |
| 9:13:16 AM | Action: Signal report         | IFP Pressure value: 4,12 kPa      |  |

Last print:

Last modification: 5/27/2020 8:16:12 AM

Last download: 5/27/2020 10:16:55 AM

# Synthesis report

4/9

SW: Version 1.1 | October 2018



Document id: S2005270363

Batch Nr: PE2I-200527-2

|            |                      |           |
|------------|----------------------|-----------|
| 9:14:02 AM | Precursor to reactor | Completed |
| 9:17:08 AM | Labelling            | Completed |
| 9:17:39 AM | Buffer to reactor    | Completed |
| 9:20:44 AM | Transfer to HPLC     | Completed |
| 9:27:14 AM | Purging of the pump  | Completed |
| 9:27:26 AM | Re-initialization    | Completed |

# Synthesis report

5/9

SW: Version 1.1 | October 2018



Document id: S2005270363

Batch Nr: PE2I-200527-2

## Synthera+ HPLC (HP183703) - Details

### Synthera+ HPLC (HP183703) - Synthesis evolution of Radiation sensor

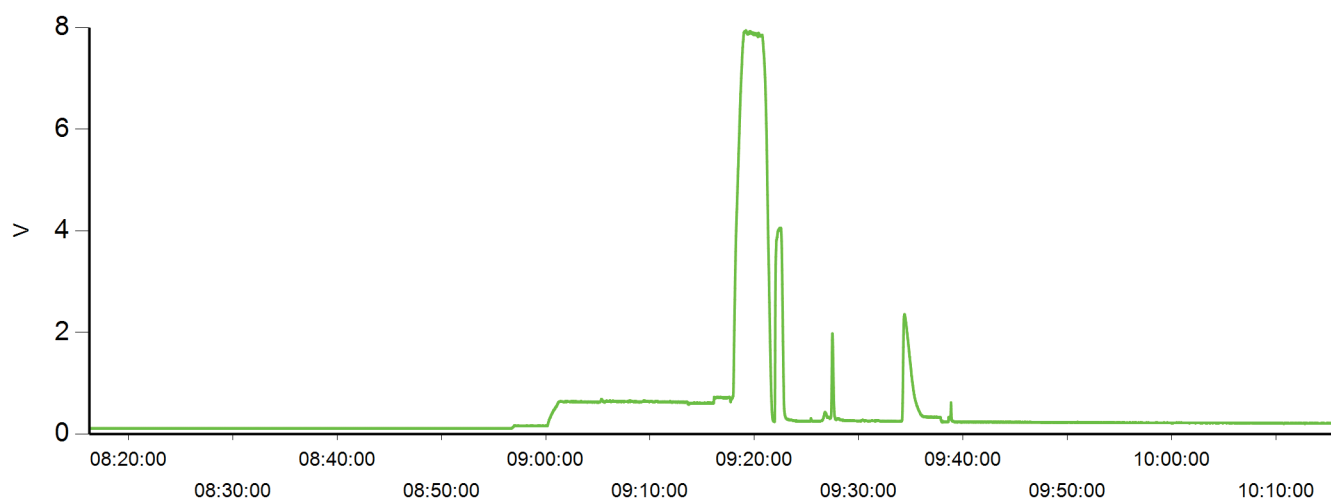

9:53:30 AM Final sequence status: Completed

8:16:13 AM Command: Load

8:17:51 AM Command: Start

#### Sequence evolution

|            |                               |           |
|------------|-------------------------------|-----------|
| 8:34:04 AM | Pre-cleaning                  | Completed |
| 8:39:39 AM | Conditioning                  | Completed |
| 9:18:10 AM | Ready to start                | Completed |
| 9:20:44 AM | Wait transfer from Synthera+  | Completed |
| 9:23:47 AM | Purification - Collection     | Completed |
| 9:34:18 AM | Press play to collect product | Completed |
| 9:34:12 AM | Action: Resume (WD;V02;1;)    |           |
| 9:41:18 AM | Press play to stop collection | Completed |
| 9:36:15 AM | Action: Resume (WD;V02;0;)    |           |
| 9:53:28 AM | Cleaning                      | Completed |

# Synthesis report

6/9

SW: Version 1.1 | October 2018

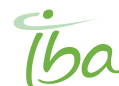

Document id: S2005270363

Batch Nr: PE2I-200527-2

## Synthera+ (SM182802) - Synthesis evolution of Temperature

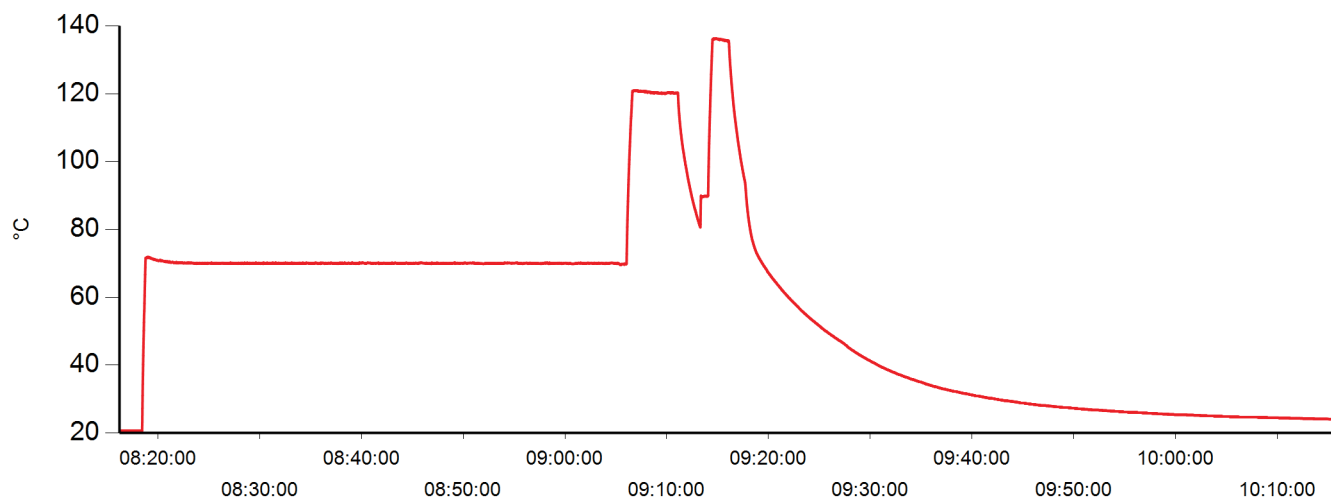

## Synthera+ (SM182802) - Synthesis evolution of Radiation sensor

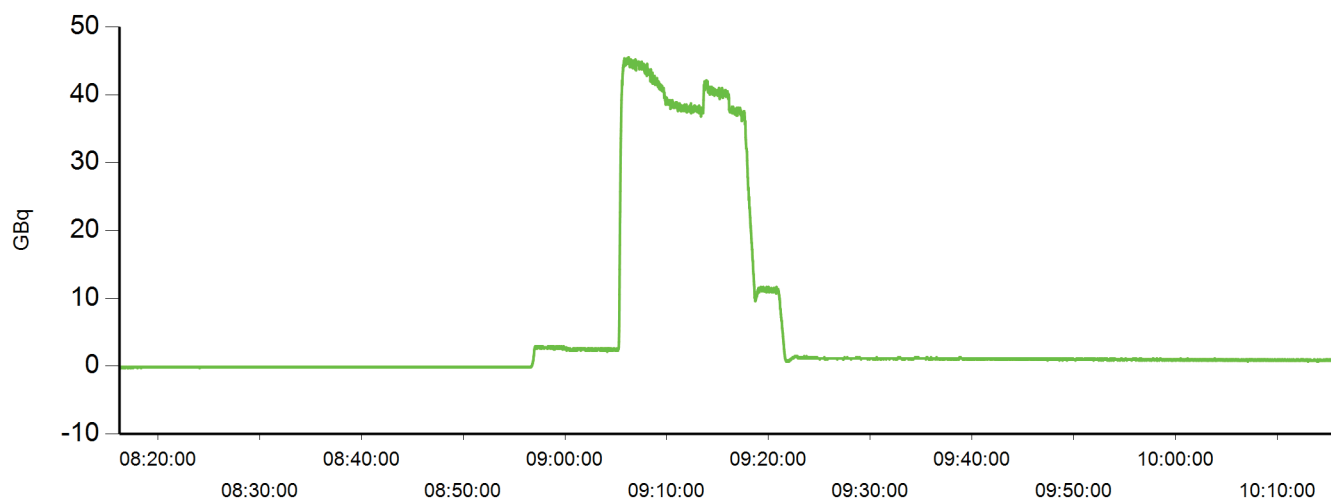

## Synthera+ (SM182802) - Synthesis evolution of Compressed air

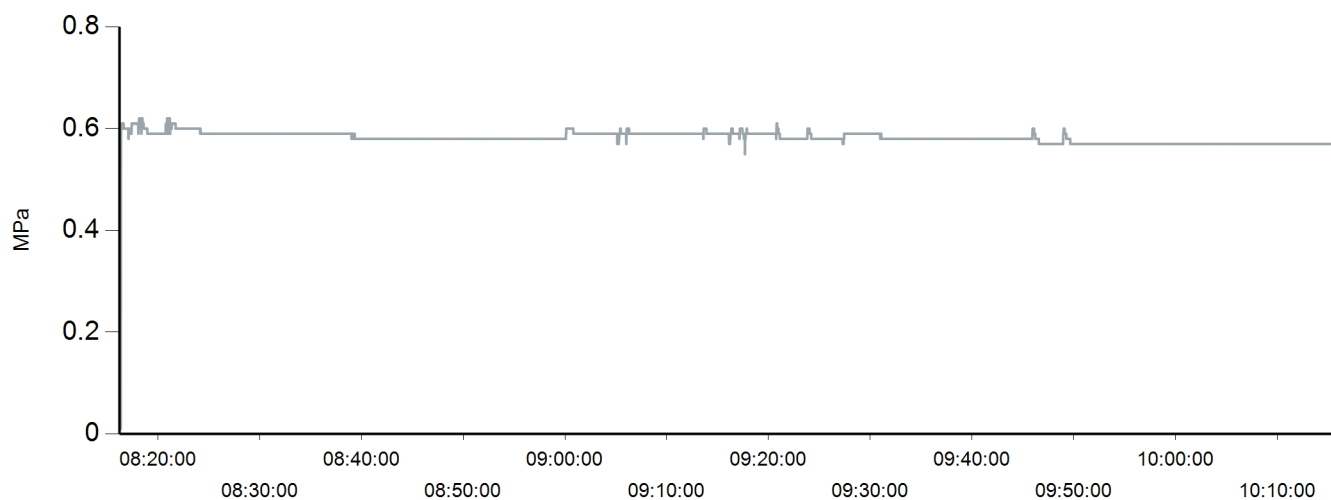

# Synthesis report

7/9

SW: Version 1.1 | October 2018

Document id: S2005270363

Batch Nr: PE2I-200527-2

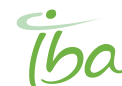

## Synthera+ (SM182802) - Synthesis evolution of IFP Pressure

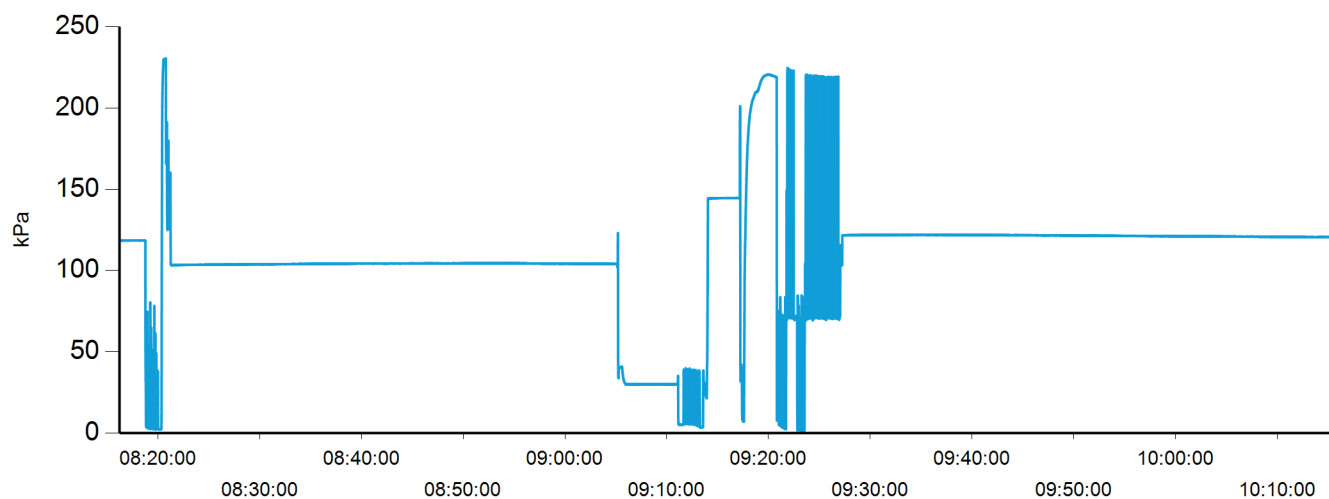

## Synthera+ (SM182802) - Synthesis evolution of Aux. Signal

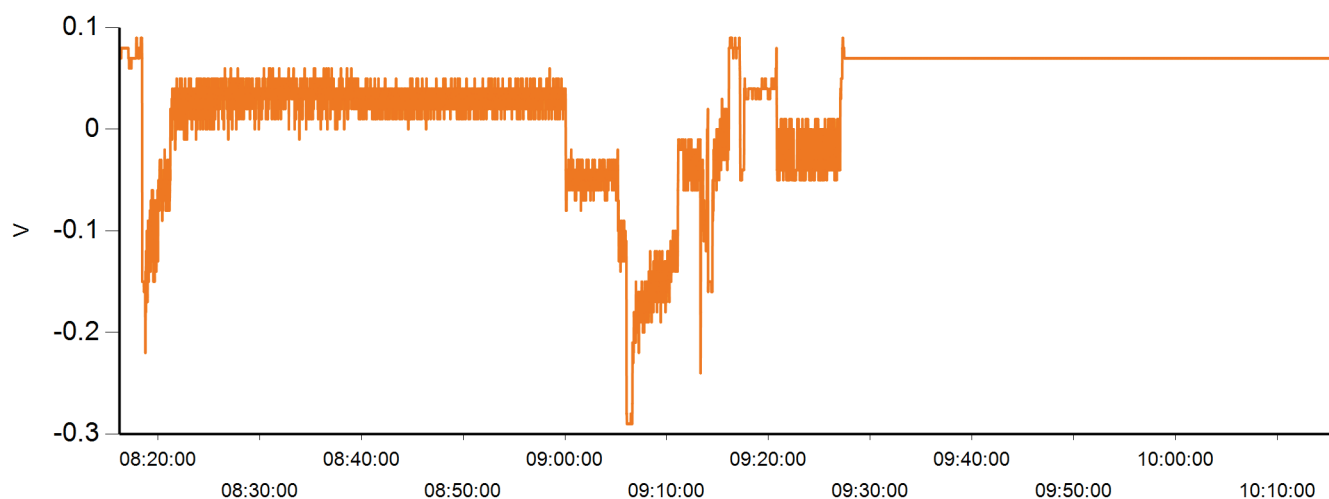

# Synthesis report

8/9

SW: Version 1.1 | October 2018

Document id: S2005270363

Batch Nr: PE2I-200527-2

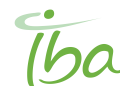

## Synthera+ HPLC (HP183703) - Synthesis evolution of Radiation sensor

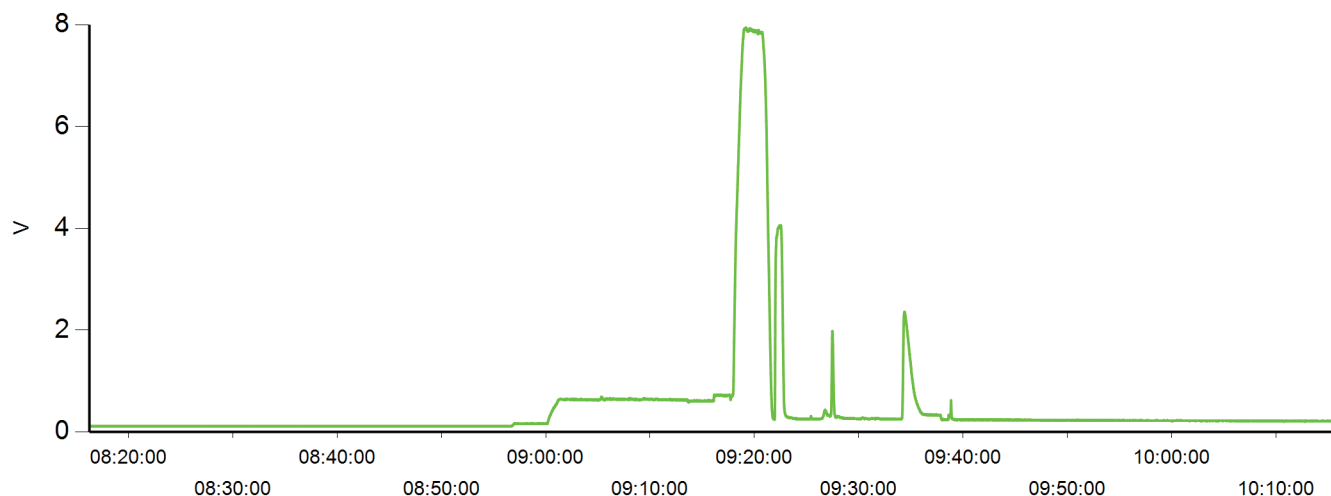

## Synthera+ HPLC (HP183703) - Synthesis evolution of Inert gas pressure

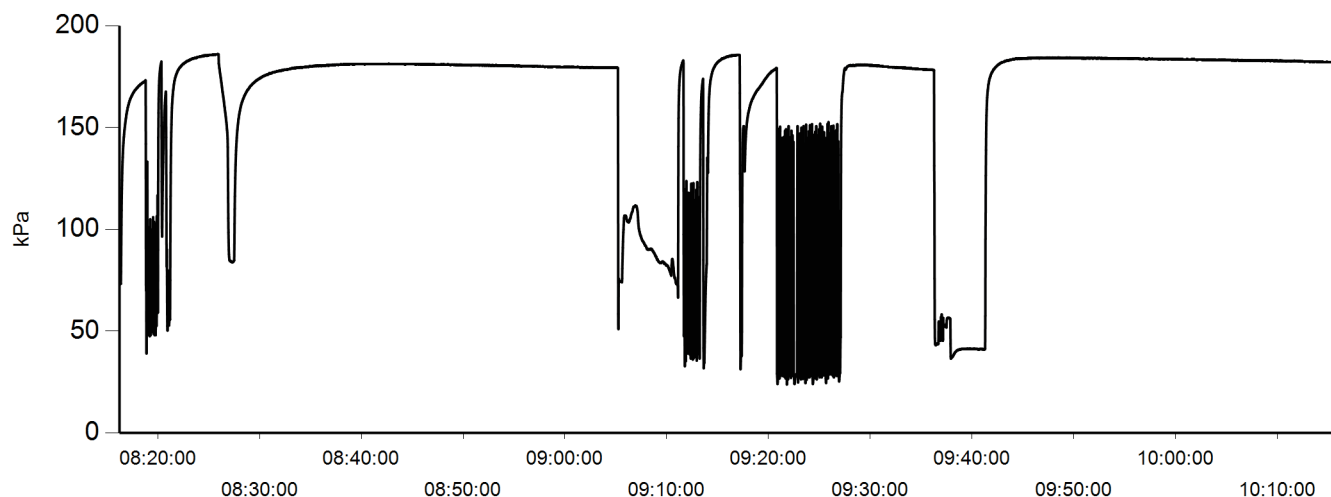

## Synthera+ HPLC (HP183703) - Synthesis evolution of Compressed air

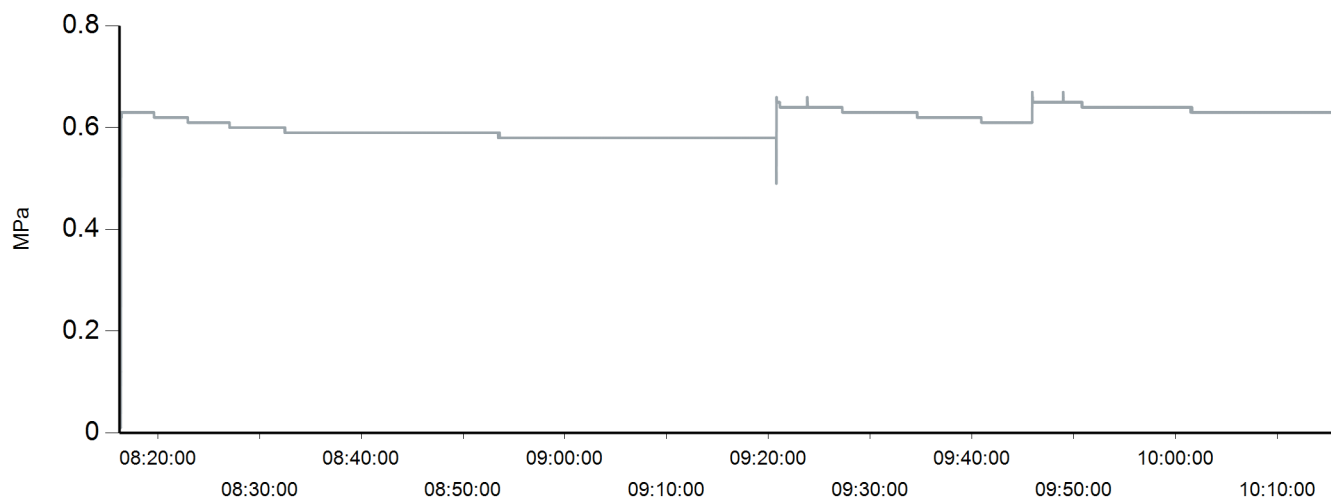



# Synthesis report

9/9

SW: Version 1.1 | October 2018

Document id: S2005270363

Batch Nr: PE2I-200527-2

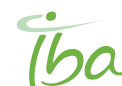

Synthera+ HPLC (HP183703) - Synthesis evolution of Aux. Signal

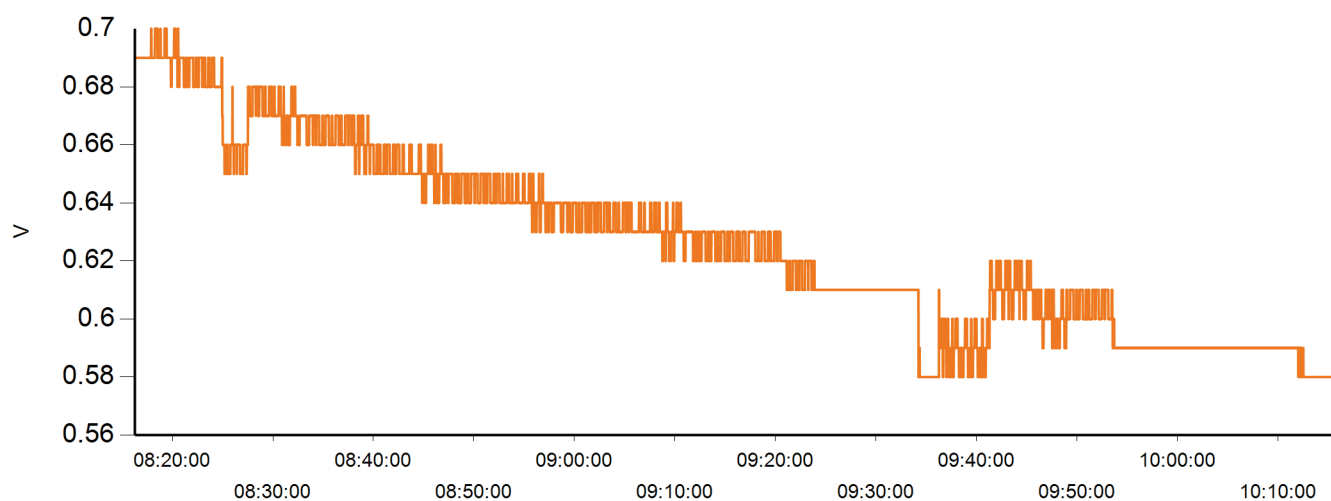

Synthera+ HPLC (HP183703) - Synthesis evolution of UV detector

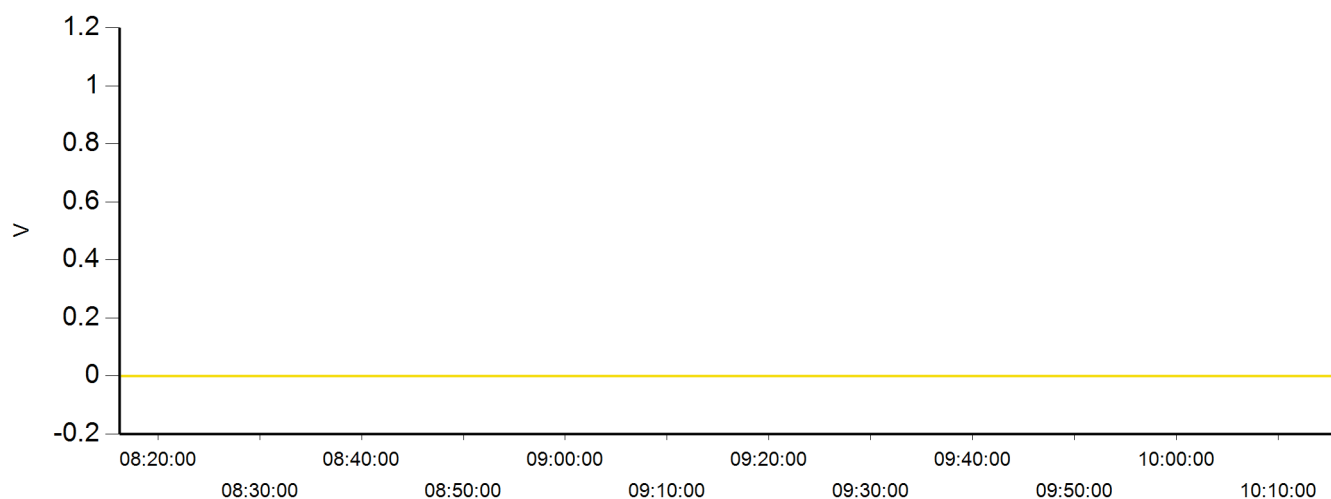

Synthera+ HPLC (HP183703) - Synthesis evolution of HPLC Pump

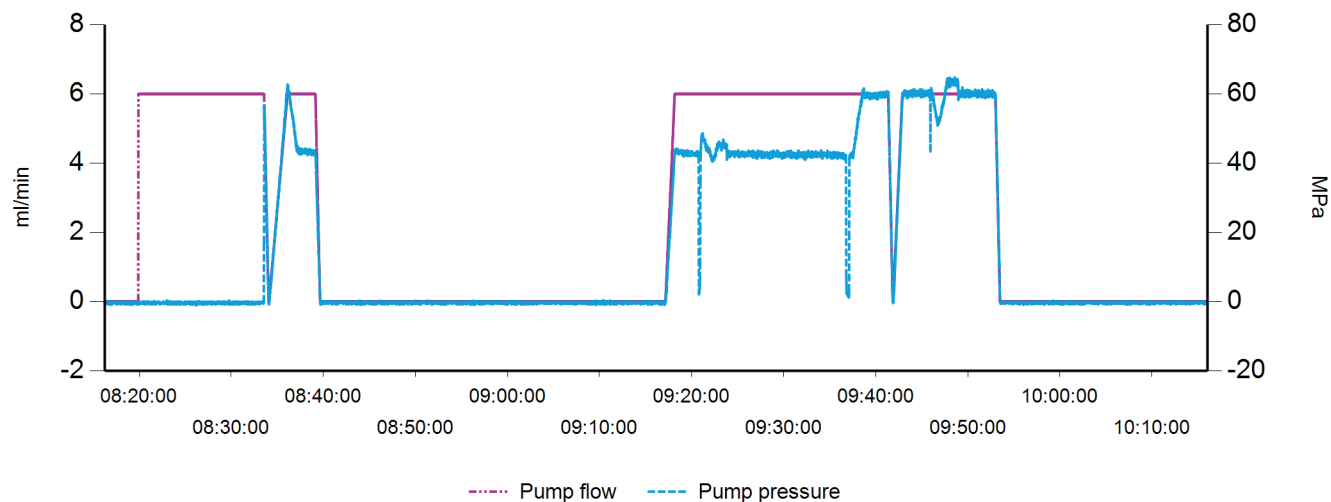

# Synthesis report

1/9

SW: Version 1.1 | October 2018

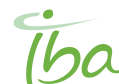

Document id: S2008180422

Batch Nr: Vasko drying DMSO3

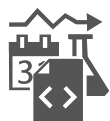

Start at 8/18/2020 11:17:13 AM  
End at 8/18/2020 11:33:40 AM  
Duration: 0:16:26

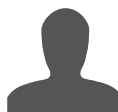

User: Denholdt Charlotte (CLD)  
Level: Supervisor

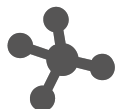

[18F]Fluorine  
FE-PE2I  
Status: Synthesis completed  
with skipped event

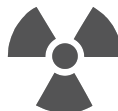

Start activity:  
End activity:  
Estimated yield: % n.d.c.

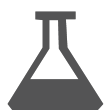

Recipe: FE-PE2I (v4)  
Script: FE-PE2I (v17)

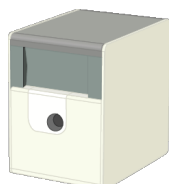

Synthera+  
IBA SN: SM182802  
Site Id: Synthera+ #1  
HW: 1246398

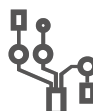

IFP: 2-2560-0618201547253  
Status: Single use IFP found  
Consumable:  
NA

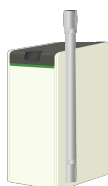

Synthera+ HPLC  
IBA SN: HP183703  
Site Id: HPLC #1  
HW: 1250402

Comments:

Name: Author

Name: Manager

Name: Quality

Date:

Date:

Date:

Comment:

Comment:

Comment:

# Synthesis report

2/9

SW: Version 1.1 | October 2018

Document id: S2008180422

Batch Nr: Vasko drying DMSO3



# Synthesis report

3/9

SW: Version 1.1 | October 2018



Document id: S2008180422

Batch Nr: Vasko drying DMSO3

## Synthera+ (SM182802) - Details

### Synthera+ (SM182802) - Synthesis evolution

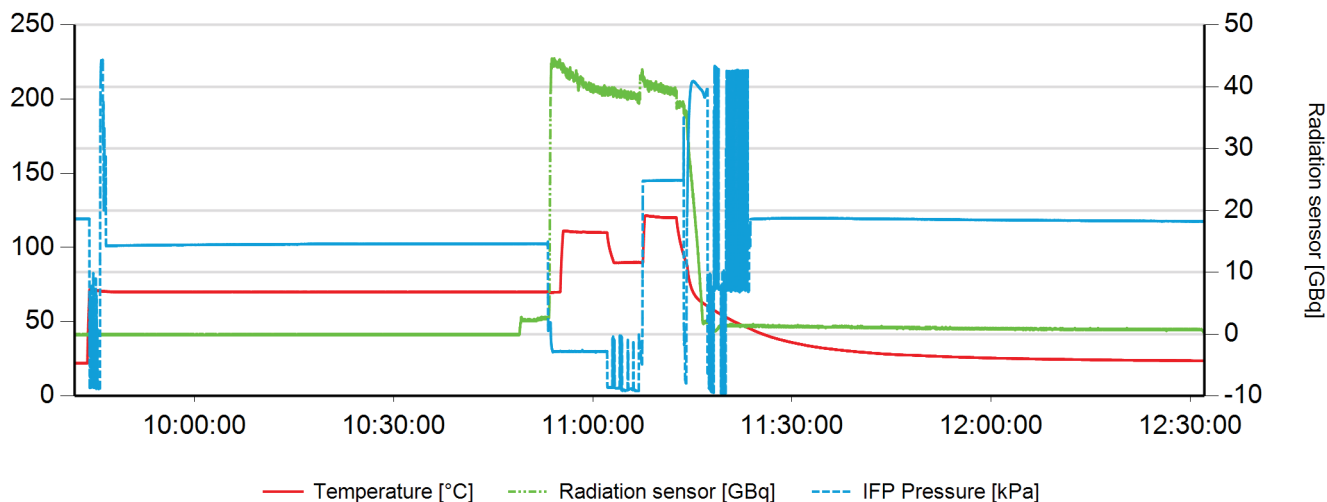

|             |                                  |  |  |
|-------------|----------------------------------|--|--|
| 11:23:56 AM | Final sequence status: Completed |  |  |
| 9:41:56 AM  | Command: Load                    |  |  |
| 9:43:15 AM  | Command: Start                   |  |  |

#### Sequence evolution

|             |                               |                                   |
|-------------|-------------------------------|-----------------------------------|
| 9:43:27 AM  | Initialization                | Completed                         |
| 9:43:50 AM  | Valve rotation test           | Completed                         |
| 9:44:07 AM  | Temperature test and pre-heat | Completed                         |
| 9:44:06 AM  | Action: Signal report         | Temperature value: 64,03 °C       |
| 9:45:24 AM  | Purging of the IFP            | Completed                         |
| 9:45:43 AM  | Vacuum test                   | Completed                         |
| 9:45:30 AM  | Action: Signal report         | IFP Pressure value: 4,92 kPa      |
| 9:45:43 AM  | Action: Signal report         | IFP Pressure value: 5,08 kPa      |
| 9:46:08 AM  | Pressure test                 | Completed                         |
| 9:45:55 AM  | Action: Signal report         | IFP Pressure value: 224,38 kPa    |
| 9:46:07 AM  | Action: Signal report         | IFP Pressure value: 225,71 kPa    |
| 10:12:03 AM | Test tube 1 - 2 - 3 - 4       | Completed                         |
| 10:51:04 AM | Ready to start                | Completed                         |
| 10:51:03 AM | Action: Resume (WD;USR;;)     |                                   |
| 10:53:10 AM | Trapping Fluorine-18          | Completed                         |
| 10:55:06 AM | Elution Fluorine-18           | Completed                         |
| 10:55:05 AM | Action: Signal report         | Radiation sensor value: 43,43 GBq |
| 11:07:03 AM | Drying Fluorine-18            | Completed                         |
| 11:06:21 AM | Action: Signal report         | IFP Pressure value: 3,75 kPa      |
| 11:07:31 AM | Precursor to reactor          | Completed                         |

Last print:

Last modification: 8/18/2020 9:41:55 AM

Last download: 10/6/2020 2:43:19 PM

# Synthesis report

4/9

SW: Version 1.1 | October 2018



Document id: S2008180422

Batch Nr: Vasko drying DMSO3

|             |                     |           |
|-------------|---------------------|-----------|
| 11:13:36 AM | Labelling           | Completed |
| 11:14:08 AM | Buffer to reactor   | Completed |
| 11:17:13 AM | Transfer to HPLC    | Completed |
| 11:23:43 AM | Purging of the pump | Completed |
| 11:23:55 AM | Re-initialization   | Completed |

# Synthesis report

5/9

SW: Version 1.1 | October 2018



Document id: S2008180422

Batch Nr: Vasko drying DMSO3

## Synthera+ HPLC (HP183703) - Details

### Synthera+ HPLC (HP183703) - Synthesis evolution of Radiation sensor

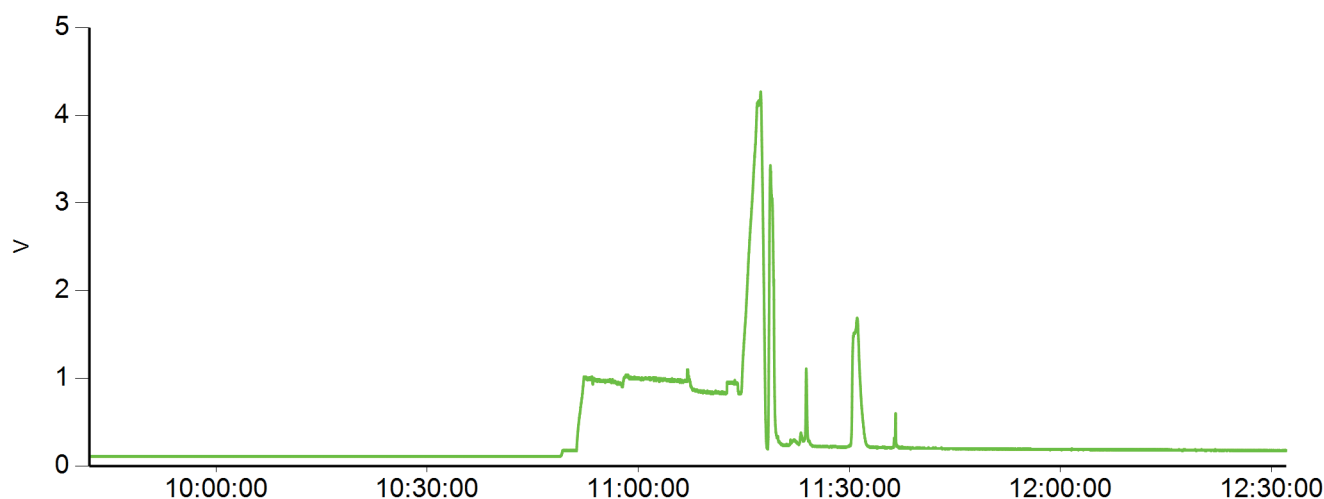

12:01:52 PM Final sequence status: Completed with skipped event

9:41:56 AM Command: Load

9:43:15 AM Command: Start

#### Sequence evolution

|             |                              |                              |
|-------------|------------------------------|------------------------------|
| 9:59:28 AM  | Pre-cleaning                 | Completed                    |
| 10:12:03 AM | Conditioning                 | Completed                    |
| 11:14:39 AM | Ready to start               | Completed                    |
| 11:17:13 AM | Wait transfer from Synthera+ | Completed                    |
| 11:33:41 AM | Purification - Collection    | Completed with skipped event |
| 11:30:20 AM | Action: Resume (WD;V02;1;)   |                              |
| 11:32:03 AM | Action: Resume (WD;V02;0;)   |                              |
| 11:33:39 AM | Action: Skip (WA;TIM;300;)   |                              |
| 12:01:51 PM | Cleaning                     | Completed                    |

# Synthesis report

6/9

SW: Version 1.1 | October 2018



Document id: S2008180422

Batch Nr: Vasko drying DMSO3

**Synthera+ (SM182802) - Synthesis evolution of Temperature**

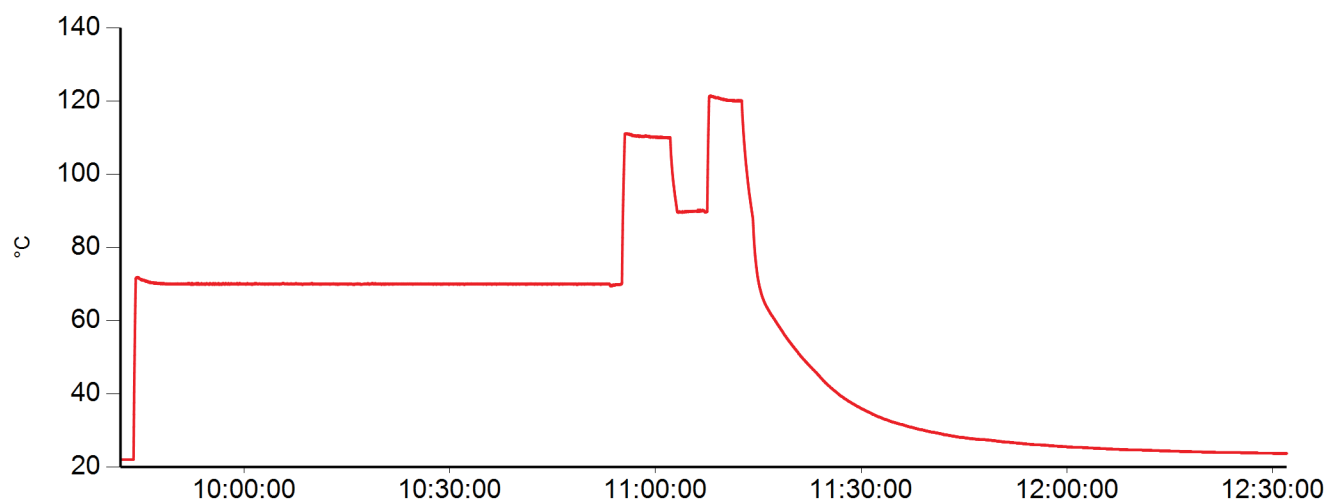

**Synthera+ (SM182802) - Synthesis evolution of Radiation sensor**

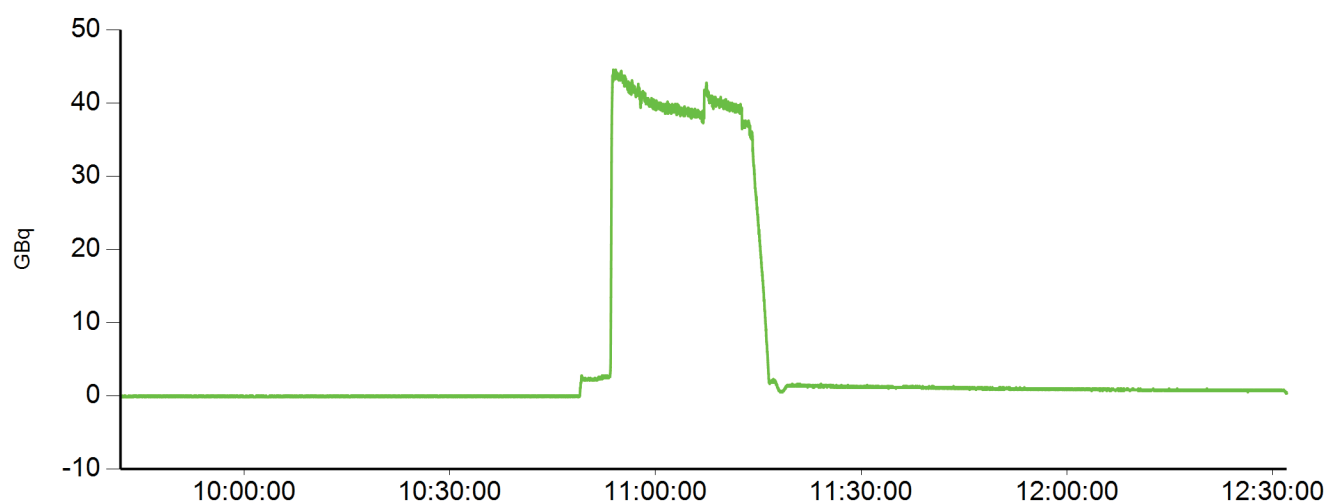

**Synthera+ (SM182802) - Synthesis evolution of Compressed air**

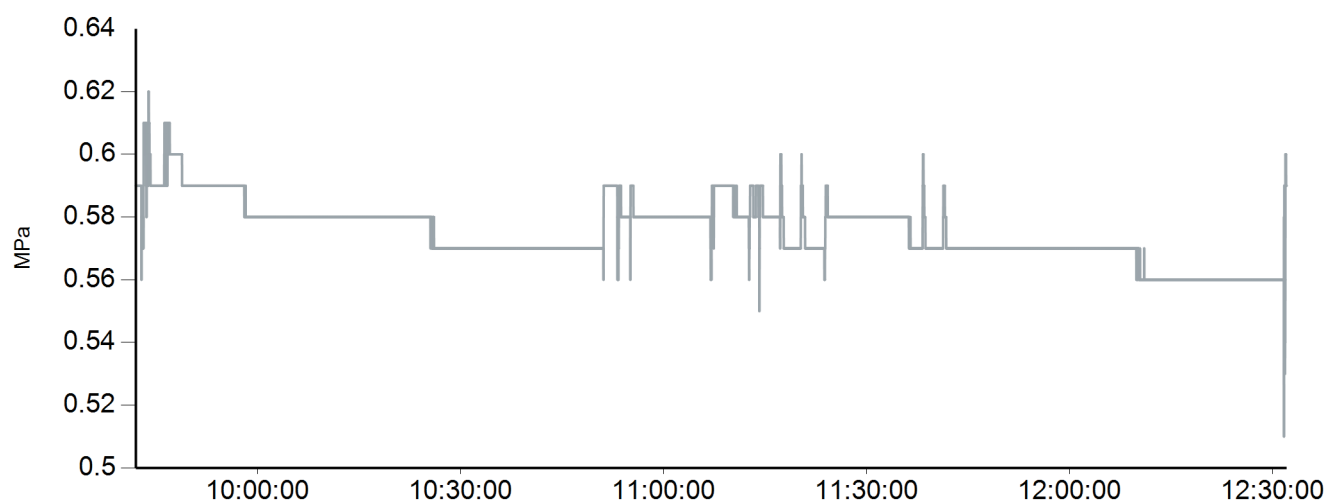

# Synthesis report

7/9

SW: Version 1.1 | October 2018

Document id: S2008180422

Batch Nr: Vasko drying DMSO3



## Synthera+ (SM182802) - Synthesis evolution of IFP Pressure

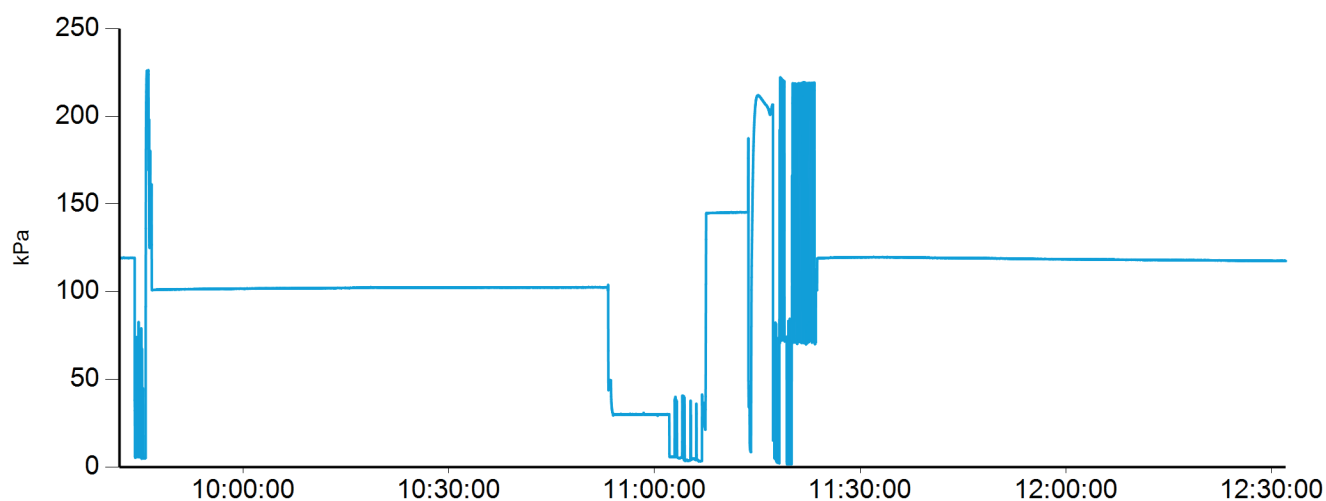

## Synthera+ (SM182802) - Synthesis evolution of Aux. Signal

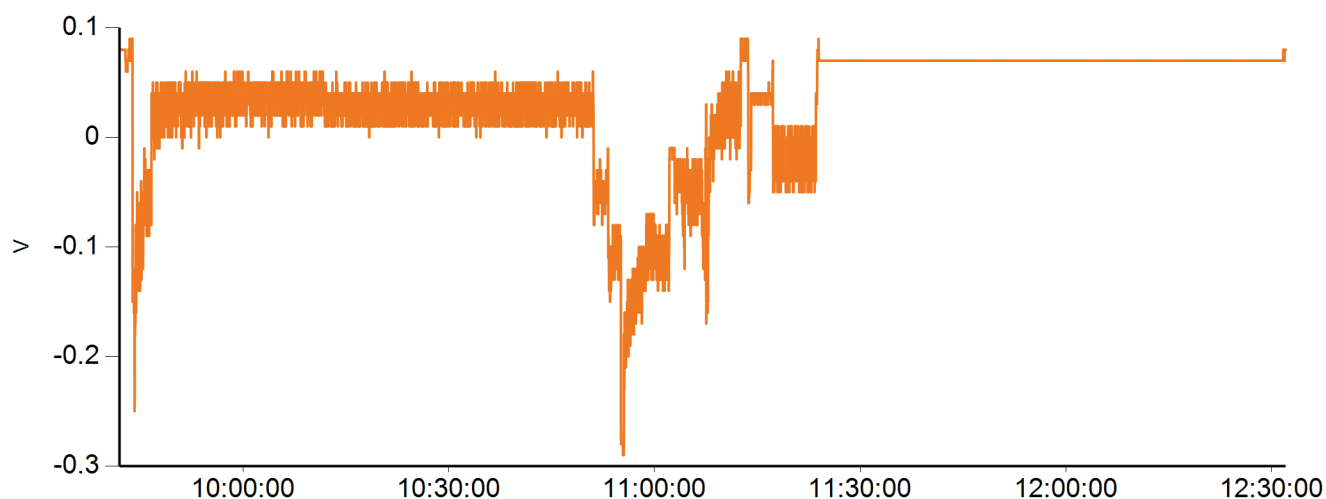



# Synthesis report

8/9

SW: Version 1.1 | October 2018

Document id: S2008180422

Batch Nr: Vasko drying DMSO3



## Synthera+ HPLC (HP183703) - Synthesis evolution of Radiation sensor

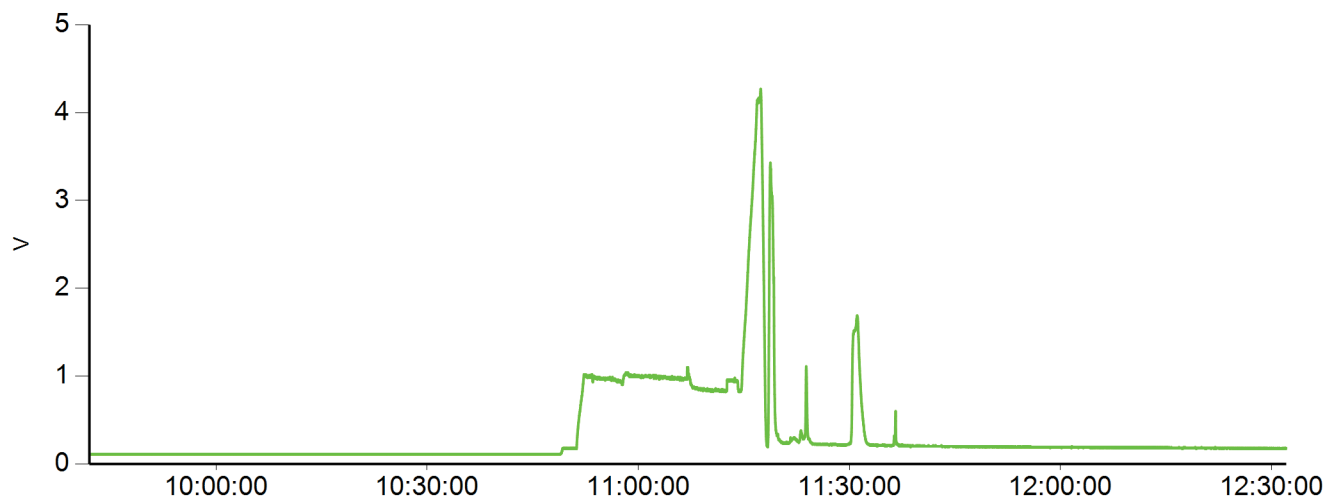

## Synthera+ HPLC (HP183703) - Synthesis evolution of Inert gas pressure

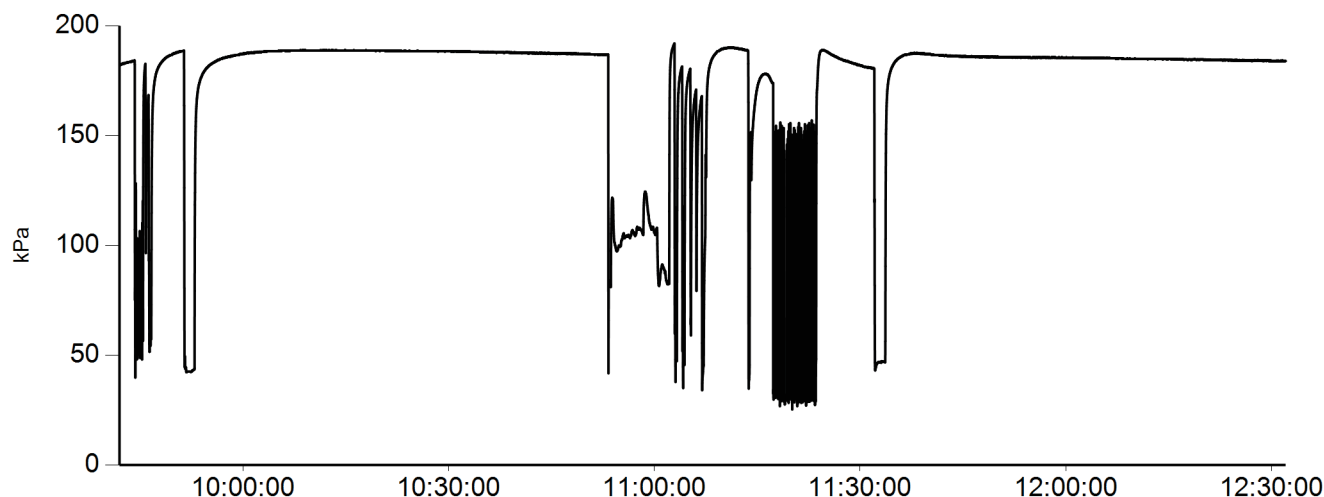

## Synthera+ HPLC (HP183703) - Synthesis evolution of Compressed air

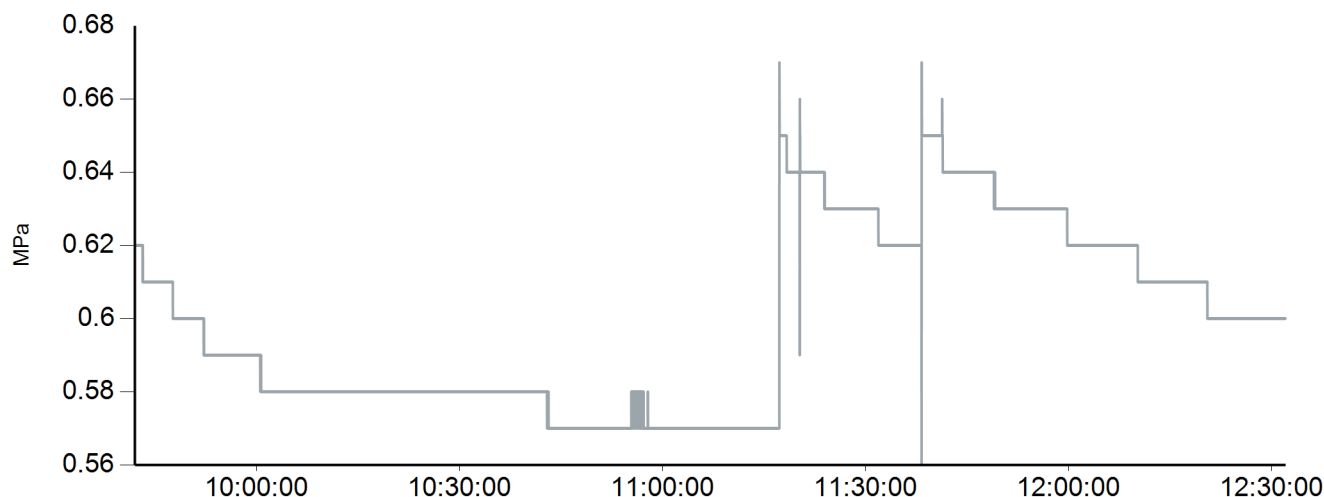

# Synthesis report

9/9

SW: Version 1.1 | October 2018

Document id: S2008180422

Batch Nr: Vasko drying DMSO3



Synthera+ HPLC (HP183703) - Synthesis evolution of Aux. Signal

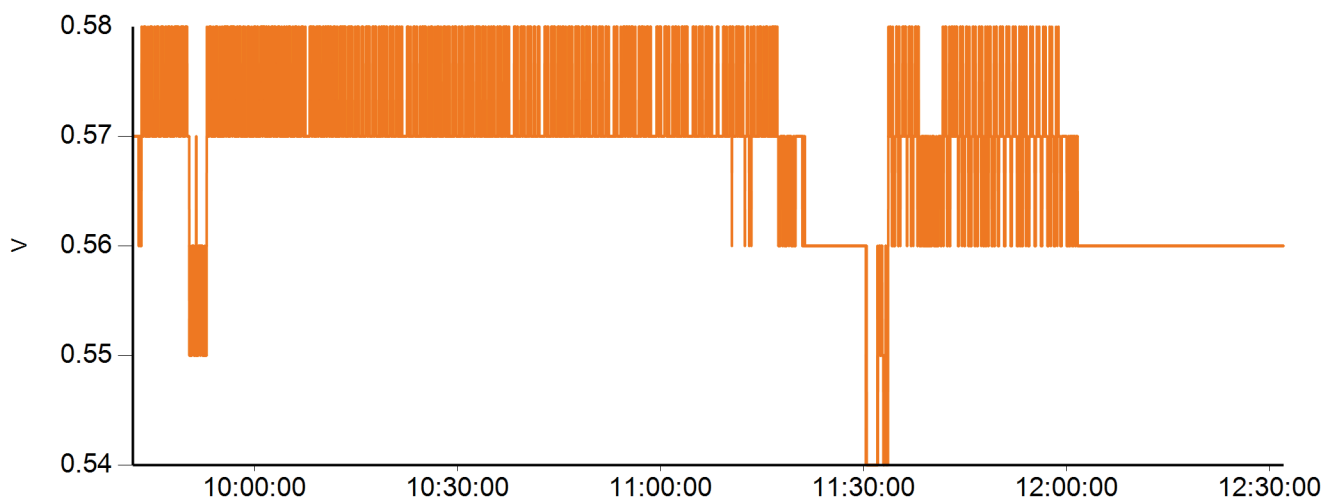

Synthera+ HPLC (HP183703) - Synthesis evolution of UV detector

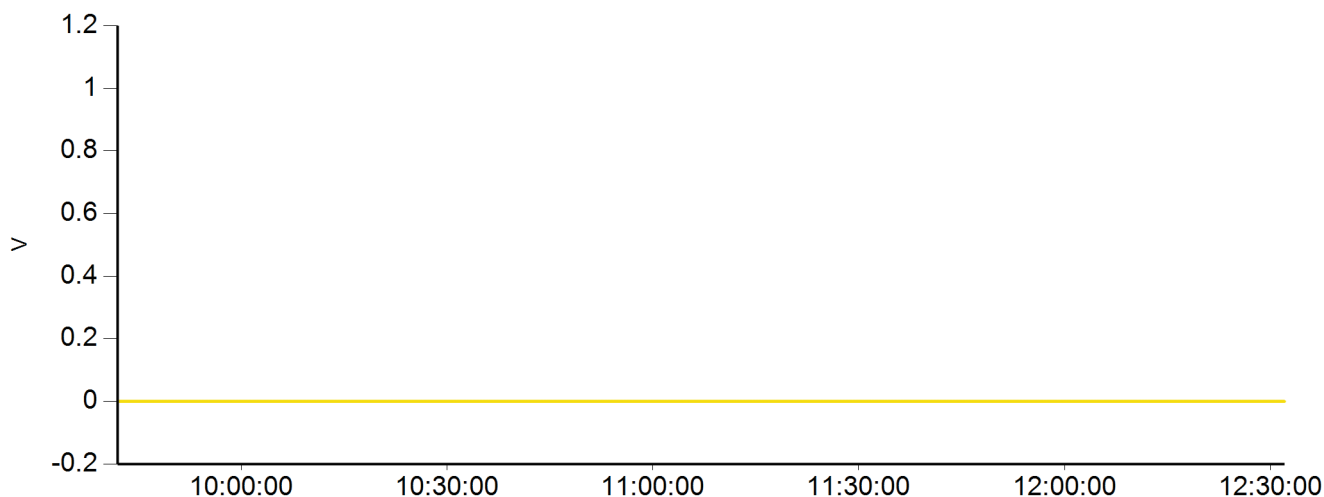

Synthera+ HPLC (HP183703) - Synthesis evolution of HPLC Pump

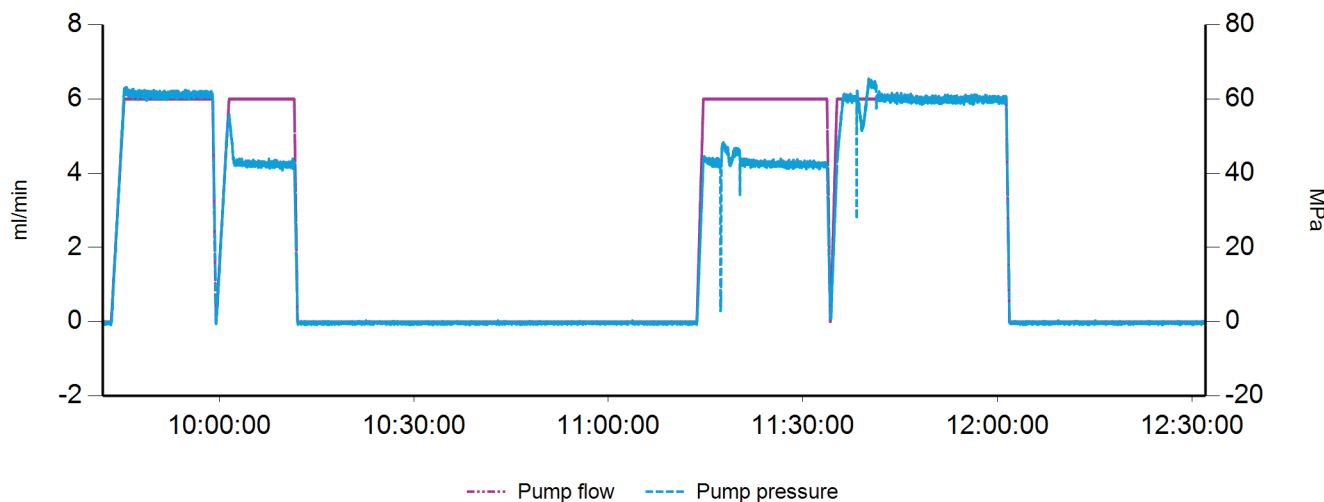

Supplement: s1 [file s1]
