# Supplementary material
Source: MDPI journal article supplement (https://www.mdpi.com/1424-8247/14/7/601)
Supplement: s1 [file s1]

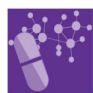

Supporting information

## Supporting information: Fully automated GMP compliant synthesis of $^{18}\text{F}$ -FE-PE2I

Klas Bratteby<sup>1,2,3,†</sup>, Charlotte Lund Denholt<sup>2,†</sup>, Szabolcs Lehel<sup>2</sup>, Ida Nyman Petersen<sup>2</sup>, Jacob Madsen<sup>2</sup>, Maria Erlandsson<sup>3</sup>, Tomas Ohlsson<sup>3</sup>, Matthias Manfred Herth<sup>1,2</sup> and Nic Gillings<sup>2,\*</sup>

<sup>1</sup> Department of Drug Design and Pharmacology, University of Copenhagen, Jagtvej 160, 2100 Copenhagen, Denmark; klas.bratteby@sund.ku.dk (KB); matthias.herth@sund.ku.dk (MMH).

<sup>2</sup> Department of Clinical Physiology Nuclear Medicine & PET, Rigshospitalet, Blegdamsvej 9, 2100 Copenhagen, Denmark; charlotte.lund.denholt@regionh.dk (CLD); szabolcs.lehel@regionh.dk (SL); ida.nymann.petersen@regionh.dk (INP); jacob.madsen@regionh.dk (JM); nicholas.mathew.gillings@regionh.dk (NG).

<sup>3</sup> Department of Radiation Physics, Skåne University Hospital, Barnåtgatan 3, 22242 Lund, Sweden; tomas.ohlsson@skane.se (TO); maria.n.erlandsson@skane.se (ME).

† These authors contributed equally to this work.

\* Correspondence: ngil0001@regionh.dk; Tel.: +45 35451678 (NG)

### Chromatograms and data from stability studies of OTsE-PE2I

Stability studies were conducted on the precursor (OTsE-PE2I) and reference (FE-PE2I) by adding solutions of the respective compounds to dried eluates from the QMA. The same experiments were performed for elutions using  $\text{K}_2\text{CO}_3/\text{K}_{222}$ ,  $\text{Et}_4\text{NHCO}_3$  and  $\text{Bu}_4\text{NH}_2\text{PO}_4$ . Some examples of the analytical HPLC chromatograms can be seen in Figure S1.

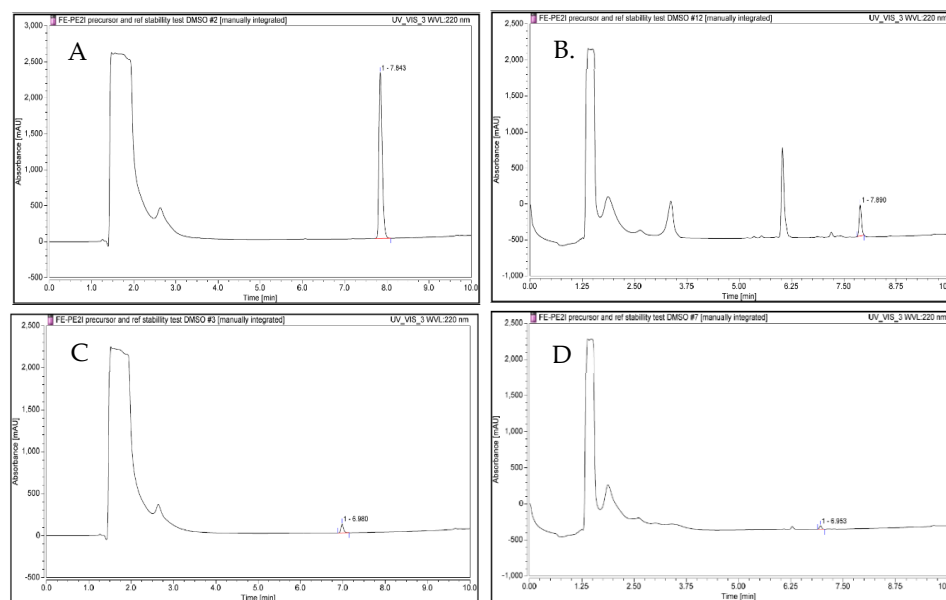

**Figure S1.** Examples of analytical HPLC chromatograms to evaluate the stability of the tosylate precursor (OTsE-PE2I) and reference (FE-PE2I) dissolved in DMSO at 120 °C added to dried QMA eluates using  $\text{Bu}_4\text{NH}_2\text{PO}_4$  (20 mM, 1 mL) for elution. The integrated peaks correspond to the identified respective compound and remaining concentration at later time points (2–15 min) where calculated as a percentage of  $t = 0$  min. The chromatograms display OTsE-PE2I dissolved in DMSO at  $t = 0$  min (A.) and  $t = 10$  min (B.) as well as FE-PE2I at  $t = 0$  min (C.) and  $t = 2$  min (D.).

*Synthesis reports for synthesis using the  $\text{K}_2\text{CO}_3/\text{K}_{222}$  and  $\text{Bu}_4\text{NH}_2\text{PO}_4$ -elution methods starting from 45 GBq starting activity on Synthera® + synthesis module.*
